# Supplementary material for: TREATMENT PROFILES AND CLINICAL OUTCOMES OF COVID-19 PATIENTS AT PRIVATE HOSPITAL IN JAKARTA
Source: bioRxiv or medRxiv preprint supplement (doi:10.1101/2020.10.14.20212449), 2020-10-16
Supplement: Supplementary file [file media-1.pdf]

|                           |                                     |                                 |                                      |
|---------------------------|-------------------------------------|---------------------------------|--------------------------------------|
| Male 39 - 58<br>Klorokuin | <= 14 days<br>Die                   | Pneumonia - Degeneratif Disease | Favipiravir + Oseltamivir +          |
| Male 39 - 58              | <= 14 days<br>Die                   | Pneumonia - Degeneratif Disease | Oseltamivir + Hidroksiklorokuin      |
| Male 59 - 78              | <= 14 days                          | Pneumonia - Degeneratif Disease | Oseltamivir + Klorokuin Die          |
| Female 59 - 78            | > 14 days<br>Negatif                | Pneumonia - Degeneratif Disease | Oseltamivir + Klorokuin Swab         |
| Male 19 - 38              | > 14 days                           | Pneumonia                       | Oseltamivir + Klorokuin Swab Negatif |
| Female 39 - 58            | <= 14 days<br>Negatif               | Pneumonia - Degeneratif Disease | Oseltamivir + Klorokuin Swab         |
| Male 19 - 38              | > 14 days                           | Pneumonia                       | Oseltamivir + Klorokuin Swab Negatif |
| Male 59 - 78              | <= 14 days                          | Pneumonia - Degeneratif Disease | Oseltamivir + Klorokuin Die          |
| Male 59 - 78              | <= 14 days                          | Pneumonia - Degeneratif Disease | Oseltamivir + Klorokuin Die          |
| Male 79 - 98              | > 14 days                           | Pneumonia - Degeneratif Disease | Oseltamivir + Klorokuin Die          |
| Female 59 - 78            | <= 14 days                          | Pneumonia - Degeneratif Disease | Oseltamivir + Klorokuin Die          |
| Male 39 - 58              | <= 14 days                          | Pneumonia - Degeneratif Disease | Oseltamivir + Klorokuin Die          |
| Female 59 - 78            | > 14 days                           | Pneumonia - Degeneratif Disease | Oseltamivir Die                      |
| Female 79 - 98            | <= 14 days                          | Pneumonia - Degeneratif Disease | Oseltamivir Die                      |
| Female 39 - 58            | <= 14 days                          | Pneumonia - Degeneratif Disease | Oseltamivir + Klorokuin Die          |
| Female 39 - 58            | <= 14 days<br>Die                   | Pneumonia - Degeneratif Disease | Oseltamivir + Hidroksiklorokuin      |
| Male 39 - 58              | <= 14 days                          | Pneumonia - Degeneratif Disease | Oseltamivir + Klorokuin Die          |
| Male 59 - 78              | <= 14 days                          | Pneumonia - Degeneratif Disease | Oseltamivir + Klorokuin Die          |
| Female 59 - 78            | > 14 days<br>Negatif                | Pneumonia - Degeneratif Disease | Oseltamivir + Klorokuin Swab         |
| Male 39 - 58              | <= 14 days                          | Pneumonia - Degeneratif Disease | Oseltamivir + Klorokuin Die          |
| Male 59 - 78              | > 14 days<br>Negatif                | Pneumonia - Degeneratif Disease | Oseltamivir + Klorokuin Swab         |
| Female 39 - 58            | <= 14 days<br>Swab Negatif          | Pneumonia - Degeneratif Disease | Oseltamivir + Hidroksiklorokuin      |
| Female 19 - 38            | > 14 days<br>Klorokuin Swab Negatif | Pneumonia - Degeneratif Disease | Favipiravir + Oseltamivir +          |

|        |                                    |                                 |                                                    |
|--------|------------------------------------|---------------------------------|----------------------------------------------------|
| Male   | 39 - 58 <= 14 days<br>Die          | Pneumonia - Degeneratif Disease | Oseltamivir + Hidroksiklorokuin                    |
| Male   | 19 - 38 <= 14 days                 | Pneumonia - Degeneratif Disease | Oseltamivir + Klorokuin Die                        |
| Female | 39 - 58 <= 14 days<br>Negatif      | Pneumonia - Degeneratif Disease | Oseltamivir + Klorokuin Swab                       |
| Male   | 39 - 58 <= 14 days                 | Pneumonia - Degeneratif Disease | Oseltamivir + Klorokuin Die                        |
| Male   | 19 - 38 <= 14 days                 | Pneumonia - Degeneratif Disease | Oseltamivir Die                                    |
| Male   | 39 - 58 > 14 days<br>Negatif       | Pneumonia - Degeneratif Disease | Oseltamivir + Klorokuin Swab                       |
| Female | 39 - 58 <= 14 days<br>Swab Negatif | Pneumonia - Degeneratif Disease | Oseltamivir + Hidroksiklorokuin                    |
| Female | 19 - 38 > 14 days                  | Pneumonia                       | Oseltamivir + Klorokuin Swab Negatif               |
| Male   | 39 - 58 <= 14 days<br>Swab Negatif | Pneumonia - Degeneratif Disease | Oseltamivir + Hidroksiklorokuin                    |
| Male   | 19 - 38 > 14 days<br>Negatif       | Pneumonia - Degeneratif Disease | Oseltamivir + Klorokuin Swab                       |
| Male   | 39 - 58 > 14 days<br>Negatif       | Pneumonia - Degeneratif Disease | Oseltamivir + Klorokuin Swab                       |
| Male   | 59 - 78 <= 14 days                 | Pneumonia - Degeneratif Disease | Oseltamivir Swab Negatif                           |
| Female | 59 - 78 > 14 days                  | Pneumonia - Degeneratif Disease | Oseltamivir Swab Negatif                           |
| Male   | 39 - 58 <= 14 days                 | Pneumonia - Degeneratif Disease | Oseltamivir Swab Negatif                           |
| Male   | 39 - 58 <= 14 days                 | Pneumonia - Degeneratif Disease | Oseltamivir Swab Negatif                           |
| Female | 19 - 38 <= 14 days                 | Pneumonia - Degeneratif Disease | Oseltamivir Swab Negatif                           |
| Male   | 59 - 78 <= 14 days                 | Pneumonia - Degeneratif Disease | Oseltamivir Swab Negatif                           |
| Female | 39 - 58 <= 14 days<br>Swab Negatif | Pneumonia - Degeneratif Disease | Oseltamivir + Hidroksiklorokuin                    |
| Female | 59 - 78 <= 14 days                 | Pneumonia - Degeneratif Disease | Oseltamivir Swab Negatif                           |
| Female | 39 - 58 <= 14 days                 | Pneumonia - Degeneratif Disease | Oseltamivir Swab Negatif                           |
| Male   | 59 - 78 <= 14 days<br>Die          | Pneumonia - Degeneratif Disease | Oseltamivir + Hidroksiklorokuin                    |
| Male   | 19 - 38 <= 14 days                 | None                            | Oseltamivir + Klorokuin Swab Negatif               |
| Female | 19 - 38 > 14 days                  | Pneumonia                       | Favipiravir + Oseltamivir + Klorokuin Swab Negatif |

|                                                    |                                 |                                       |              |
|----------------------------------------------------|---------------------------------|---------------------------------------|--------------|
| Female 39 - 58 > 14 days                           | Pneumonia                       | Oseltamivir + Klorokuin               | Swab Negatif |
| Male 39 - 58 > 14 days<br>Negatif                  | Pneumonia - Degeneratif Disease | Oseltamivir + Klorokuin               | Swab Negatif |
| Male 19 - 38 > 14 days<br>Negatif                  | Pneumonia - Degeneratif Disease | Oseltamivir + Klorokuin               | Swab Negatif |
| Female 39 - 58 <= 14 days                          | None                            | Favipiravir + Klorokuin               | Swab Negatif |
| Male 59 - 78 <= 14 days                            | None                            | Favipiravir + Oseltamivir + Klorokuin | Swab Negatif |
| Male 39 - 58 <= 14 days                            | None                            | Favipiravir + Klorokuin               | Swab Negatif |
| Female 39 - 58 > 14 days<br>Klorokuin Swab Negatif | Pneumonia - Degeneratif Disease | Favipiravir + Oseltamivir +           |              |
| Male 39 - 58 > 14 days<br>Klorokuin Swab Negatif   | Pneumonia - Degeneratif Disease | Favipiravir + Oseltamivir +           |              |
| Female 19 - 38 > 14 days<br>Klorokuin Swab Negatif | Pneumonia - Degeneratif Disease | Favipiravir + Oseltamivir +           |              |
| Male 59 - 78 > 14 days<br>Negatif                  | Pneumonia - Degeneratif Disease | Favipiravir + Klorokuin               | Swab Negatif |
| Male 59 - 78 <= 14 days<br>Negatif                 | Pneumonia - Degeneratif Disease | Favipiravir + Klorokuin               | Swab Negatif |
| Male 39 - 58 > 14 days<br>Klorokuin Swab Negatif   | Pneumonia - Degeneratif Disease | Favipiravir + Oseltamivir +           |              |
| Female 19 - 38 > 14 days                           | Pneumonia                       | Favipiravir + Klorokuin               | Swab Negatif |
| Male 59 - 78 > 14 days                             | Pneumonia                       | Favipiravir + Oseltamivir + Klorokuin | Swab Negatif |
| Male 39 - 58 > 14 days<br>Klorokuin Swab Negatif   | Pneumonia - Degeneratif Disease | Favipiravir + Oseltamivir +           |              |
| Male 59 - 78 > 14 days<br>Negatif                  | Pneumonia - Degeneratif Disease | Favipiravir + Klorokuin               | Swab Negatif |
| Male 59 - 78 <= 14 days<br>Klorokuin Swab Negatif  | Pneumonia - Degeneratif Disease | Favipiravir + Oseltamivir +           |              |
| Male 39 - 58 > 14 days                             | None                            | Favipiravir + Klorokuin               | Swab Negatif |
| Male 19 - 38 > 14 days                             | Pneumonia                       | Favipiravir + Oseltamivir + Klorokuin | Swab Negatif |
| Male 39 - 58 <= 14 days                            | None                            | Oseltamivir                           | Swab Negatif |
| Male 19 - 38 <= 14 days                            | Pneumonia                       | Oseltamivir                           | Swab Negatif |
| Female 39 - 58 > 14 days                           | Pneumonia                       | Favipiravir + Klorokuin               | Swab Negatif |

|                                   |                                 |                              |
|-----------------------------------|---------------------------------|------------------------------|
| Male 59 - 78 > 14 days<br>Negatif | Pneumonia - Degeneratif Disease | Oseltamivir + Klorokuin Swab |
| Female 19 - 38 <= 14 days         | None Oseltamivir Swab Negatif   |                              |
| Female 39 - 58 <= 14 days         | Pneumonia - Degeneratif Disease | Oseltamivir Swab Negatif     |
| Male 59 - 78 <= 14 days           | Pneumonia - Degeneratif Disease | Oseltamivir Swab Negatif     |
